# Supplementary material for: Influence of phase transitions and defect associates on the oxygen migration in the ion conductor Na1/2Bi1/2TiO3
Source: Royal Society of Chemistry journal article supplement (doi:10.1039/c6ta10566a), 2017-01-01
Supplement: c6ta10566a1.pdf [file c6ta10566a1.pdf]

## Supporting information

### “Influence of phase transitions and defect associates on the oxygen migration in the ion conductor $\text{Na}_{1/2}\text{Bi}_{1/2}\text{TiO}_3$ ”

Kai-Christian Meyer and Karsten Albe

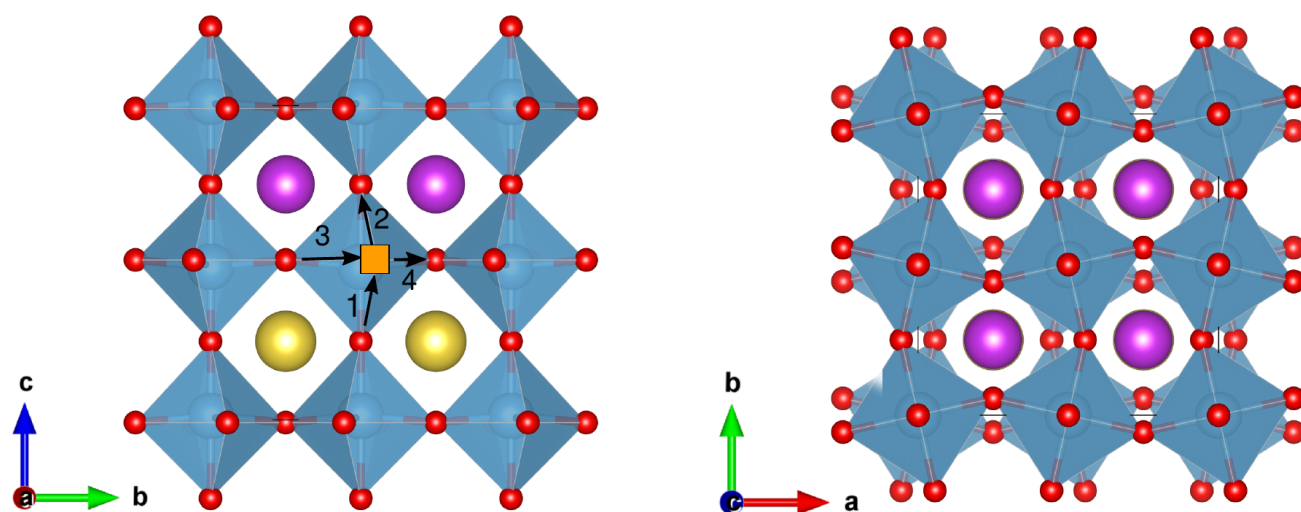

**Figure S1** **Left:** Oxygen vacancy migration paths in the tetragonal structure. View along the [100]-direction. **Right:** The tetragonal structure viewed along the [001]-direction

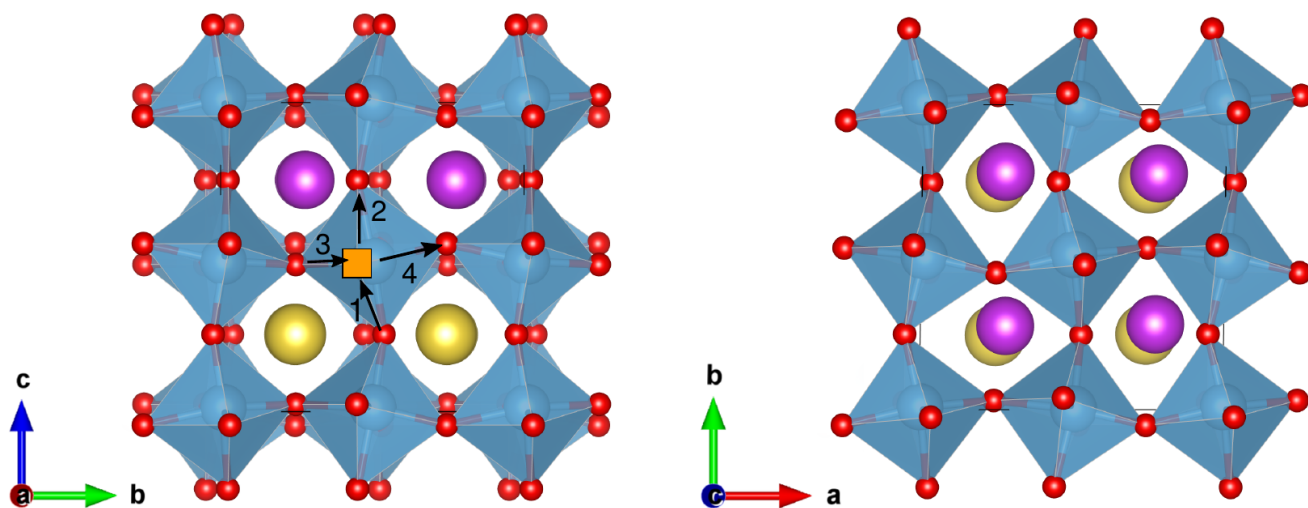

**Figure S2** Left: Oxygen vacancy migration paths in the orthorhombic structure. View along the [100]-direction. Right: The rhombohedral structure viewed along the [001]-direction.

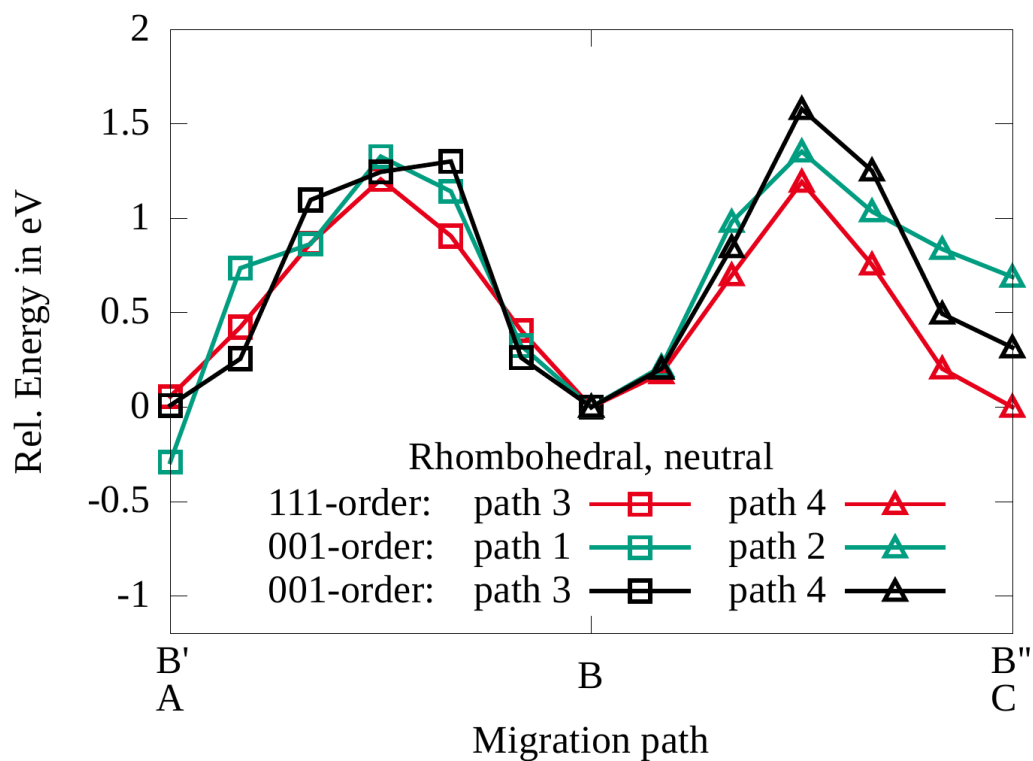

**Figure S3** Oxygen vacancy migration barriers in the rhombohedral cell for the "neutral" case.

tetragonal structure II, path 4 (low barrier)

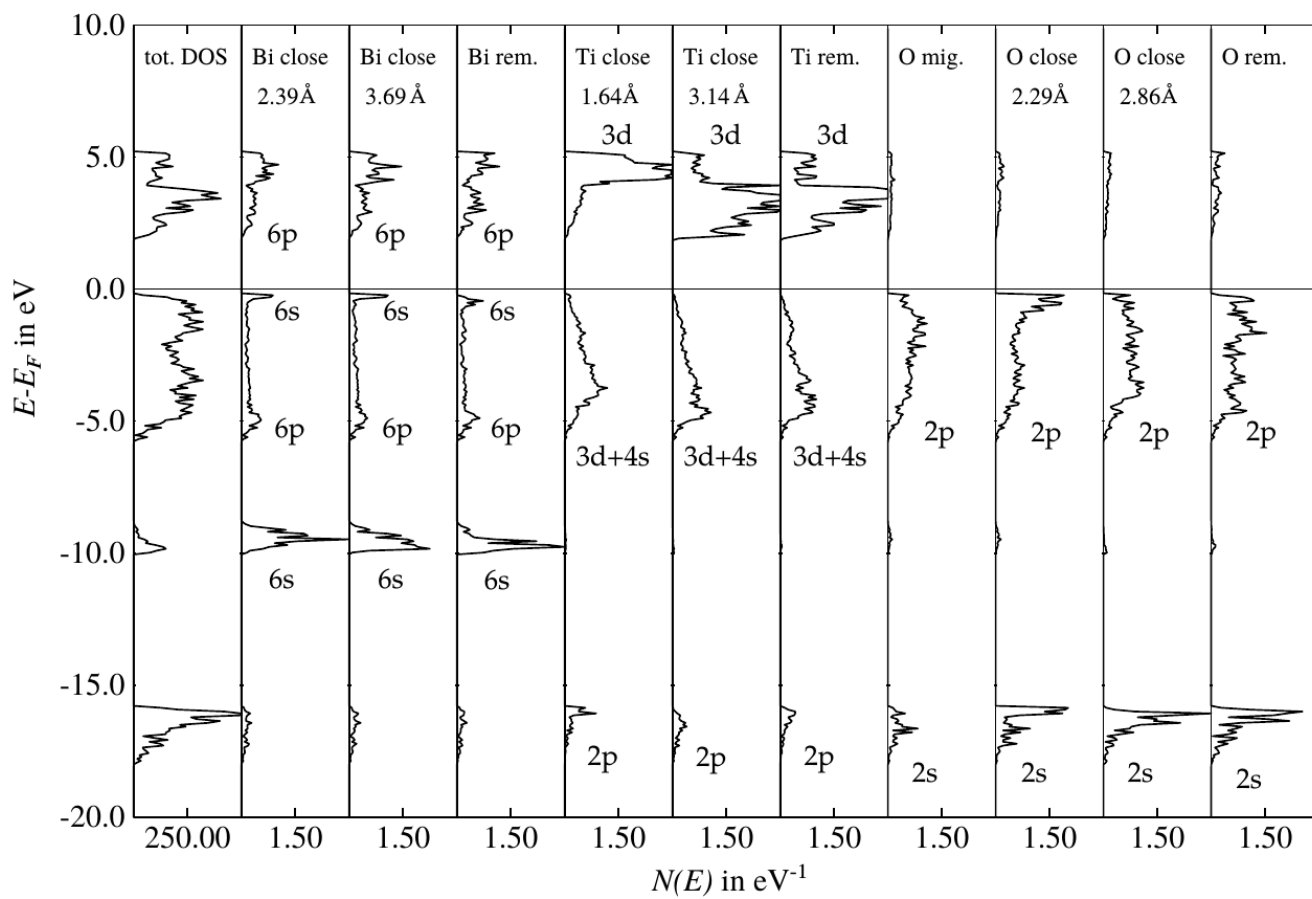

**Figure S4** Electronic density of states of selected ions for the tetragonal structure II with a low migration energy barrier.
